# Supplementary material
Source: Springer Nature journal article supplement (https://www.springermedizin.de/resource/supplementary/12889_2013_7520_MOESM1_ESM.pdf/9498378)
Supplement: MOESM1 [file 9498378]

Enrolment

Assessed for eligibility

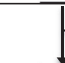

Baseline assessment

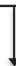

Randomisation

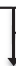

Allocated to intervention group  
(coaches, n= 4  
athletes, n =  
40)

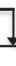

Allocated to control group  
(coaches, n= 4  
athletes, n =  
40)

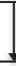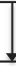

Intervention coach education/control

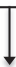

Post-intervention assessment

Allocation

Intervention

Follow up

Ineligible:

- Do not meet inclusion criteria
- Fail to return informed consent/assent
